# Supplementary material
Source: PubMed Central journal article supplement (PMC5022775)

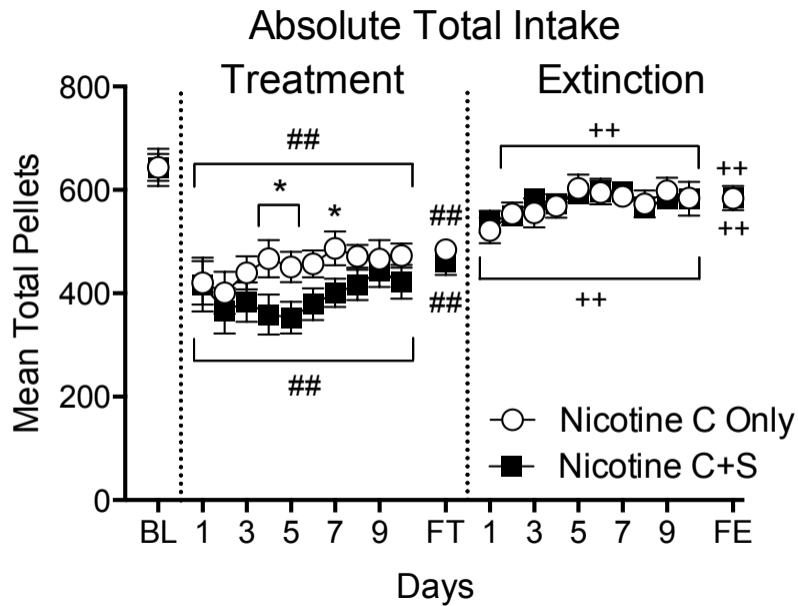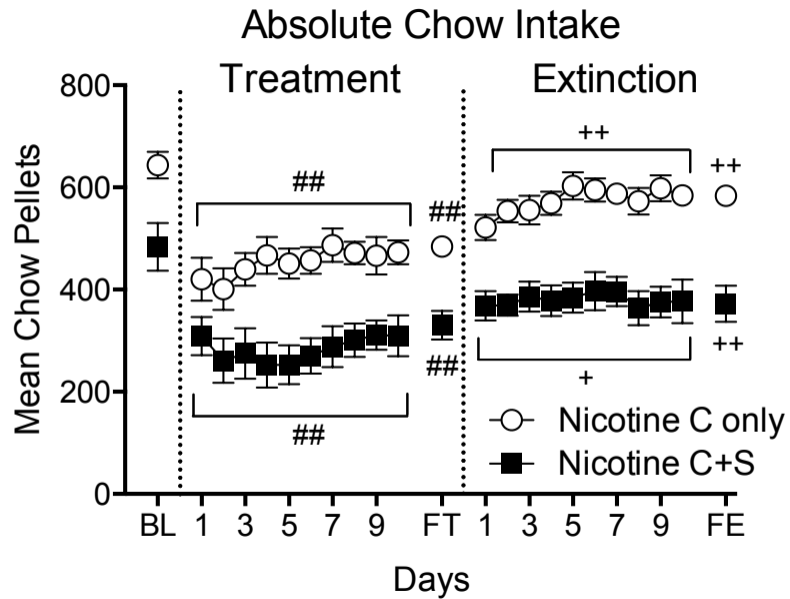

Supplement: NIHMS742599-supplement-Supplemental_figure_1.pdf [file NIHMS742599-supplement-Supplemental_figure_1.pdf]
